# Supplementary material for: PhosphoregDB: The tissue and sub-cellular distribution of mammalian protein kinases and phosphatases
Source: PubMed Central journal article supplement (PMC1395337; doi:10.1186/1471-2105-7-82), 2006-02-20
Supplement: 1471-2105-7-82-S5.pdf [file 1471-2105-7-82-S5.pdf]

**Supplementary table1:** Primer sequences used in the fusion PCR technique

| Oligo name                              | Primers for Gene specific products                                     | Description                                                                          |
|-----------------------------------------|------------------------------------------------------------------------|--------------------------------------------------------------------------------------|
| GSN1                                    | GAAGGAGCCGCCACCATG (X)n                                                | In frame gene-specific overlap primer for N-terminal tagging                         |
| GSC1                                    | ATCCTTCTGATATCAGCTTCTGTTC (X)n                                         | In frame gene-specific overlap primer for C-terminal tagging                         |
| P8                                      | AGCGGATAACAATTTACACAGGAAAC                                             | Vector specific primer used for FANTOM clones in N-term system                       |
| P15                                     | AGCGGATAACAATTTACACAGGAAACCGCCAGGGTTTTCCCAGTCACGAC                     | Vector specific primer used for ZA series FANTOM clones in N-term system             |
| AL18                                    | GGACTCAGATCTCGAGCTCAAGGAATTGTAATACGACTCACTATAGG                        | Vector specific primer used for FANTOM clones in N-term system                       |
| AL28                                    | GGACTCAGATCTCGAGCTCAAGGAATTAACCTCACTAAAGGG                             | Vector specific primer used for ZA series FANTOM clones in N-term system             |
| <b>Primers for promoter fragments</b>   |                                                                        |                                                                                      |
| AL33                                    | GACGCGCTTCTGCTTCGAGACTCGCTTACCTGATGCTGCGTTATCCCCTGATTCTGTGGA           | Used to introduce primer sequences AL34 and AL35 to promoter cassette from EGFP-C1   |
| AL34                                    | GACGCGCTTCTGCTTCGAGAC                                                  | Used to amplify the promoter fragment                                                |
| AL35                                    | GACTCGCTTACCTGATGCTGC                                                  | Nested primer used to prime off the promoter fragment during the fusion PCR step     |
| AL1                                     | AACCGTATTACCGCCATGCAT                                                  | Additional promoter fragment nested primer for reamplification of weak products      |
| AL41                                    | CATGGTGGCGGCTCCTTCCAGATCCTTCTGATATCAGCTTCTGTTCCATGGTGGCGACCGGTAGCGCTAG | Used to introduce an n-terminal myc tag onto the CMV promoter cassette from EGFP-C1  |
| AL19                                    | CTTGAGCTCGAGATCTGAGTCC                                                 | Used to amplify the CMV promoter cassette from EGFP-C1                               |
| <b>Primers for terminator fragments</b> |                                                                        |                                                                                      |
| AL36                                    | GGCTCTTGCATGGTTTGACGACGTGCTCAGTACGCTGGACAAACCACAAC TAGAATGC            | Used to introduce primer sequences AL37 and AL38 to terminator cassette from EGFP-C1 |
| AL37                                    | GGCTCTTGCATGGTTTGACG                                                   | Used to amplify the terminator fragment                                              |
| AL38                                    | CGACGTGCTCAGTACGCTGGA                                                  | Nested primer used to prime off the terminator fragment during the fusion PCR step   |
| AL5                                     | GGACAAACCACAAC TAGAATGC                                                | Additional terminator fragment nested primer for reamplification of weak products    |
| AL25                                    | GTTTCCTGTGTGAAATTGTTATCCGCTCGAATCTGTCAGTCGACGGTACC                     | nterm vec overlap for term                                                           |
| AL40                                    | GAACAGAAGCTGATATCAGAAGAGGATCTGtagCGAATCTGTCAGTCGACGGTACC               | cterm sys myc term                                                                   |

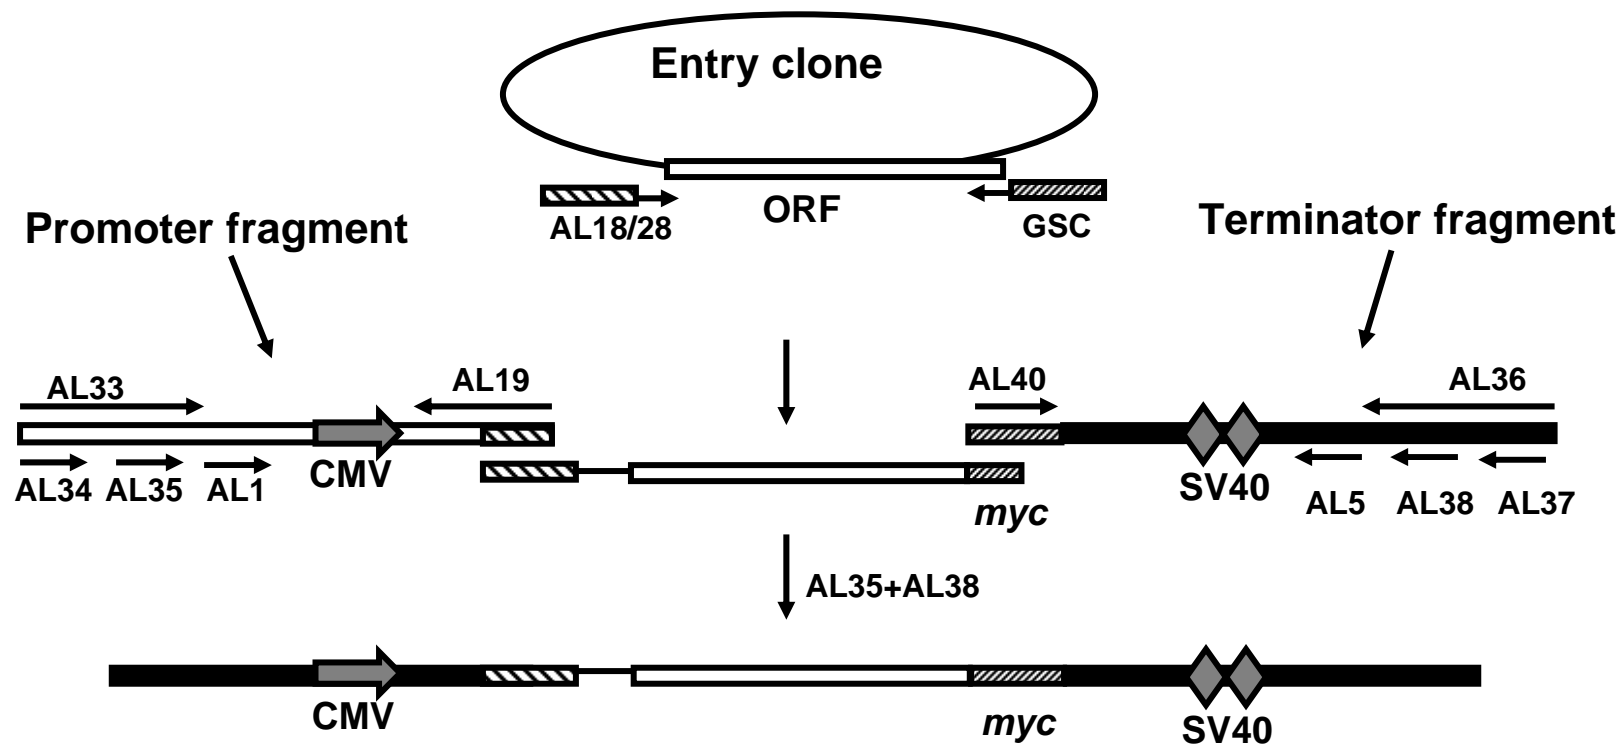

Supplementary figure 1: Generation of c-terminally tagged open reading frames
